# Supplementary material for: Short-Term Effect of Temperature Change on Non-Accidental Mortality in Shenzhen, China
Source: MDPI journal article supplement (doi:10.3390/ijerph18168760), 2021-08-19
Supplement: s1 [file s1]

## **Supplementary material**

### **Short-Term Effect of Temperature Change on Non-Accidental Mortality in Shenzhen, China**

Yao Xiao, Chengzhen Meng, Suli Huang, Yanran Duan, Gang Liu, Shuyuan Yu,  
Ji Peng, Jinquan Cheng, Ping Yin

## **List of Tables and Figures**

**Table S1** Quasi-Akaike information criterion (Q-AIC) values for DTR-model.

**Table S2** Quasi-Akaike information criterion (Q-AIC) values for TCN-model.

**Table S3** Spearman's correlation coefficients among different air pollutant concentrations and meteorological factors in Shenzhen from 2013 to 2017.

**Table S4** Relative risk (95% *CI*) of non-accidental mortality for extreme high DTR at single-day and cumulative lag periods by varying modeling choices.

**Table S5** Relative risk (95% *CI*) of non-accidental mortality for extreme high DTR at single-day and cumulative lag periods with adjustment for the TCN variable.

**Table S6** Relative risk (95% *CI*) of non-accidental mortality for extreme high DTR at single-day and cumulative lag periods with adjustment for co-pollutants.

**Table S7** Relative risk (95% *CI*) of non-accidental mortality for extreme high DTR at single-day and cumulative lag periods with adjustment for apparent temperature.

**Table S8** Relative risk (95% *CI*) of non-accidental mortality for extreme high DTR at single-day and cumulative lag periods with adjustment for lag periods.

**Table S9** Relative risk (95% *CI*) of non-accidental mortality for extreme high TCN at single-day and cumulative lag periods by varying modeling choices.

**Table S10** Relative risk (95% *CI*) of non-accidental mortality for extreme high TCN at single-day and cumulative lag periods with adjustment for the DTR variable.

**Table S11** Relative risk (95% *CI*) of non-accidental mortality for extreme high TCN at single-day and cumulative lag periods with adjustment for co-pollutants.

**Table S12** Relative risk (95% *CI*) of non-accidental mortality for extreme high TCN at single-day and cumulative lag periods with adjustment for apparent temperature.

**Figure S1.** Exposure–response relationship between temperature change and risk of non-accidental mortality. Left panels: 3D plots of the exposure–lag–response risks. Right panels: overall exposure–response associations with diurnal temperature change (DTR) and temperature change between neighboring days (TCN).

**Figure S2.** Bivariate response surface of apparent temperature and temperature change on non-accidental mortality (Left: lag 0–5 for DTR and lag 0 for AT; right: lag 0–5 for TCN and lag 0 for AT).

**Table S1.** Quasi-Akaike information criterion (Q-AIC) <sup>a</sup> values for DTR-model.

| df for<br>DTR | df for DTR lag  |          |          |          |          |
|---------------|-----------------|----------|----------|----------|----------|
|               | 2               | 3        | 4        | 5        | 6        |
| 2             | <b>11664.12</b> | 11668.21 | 11669.57 | 11671.65 | 11670.98 |
| 3             | 11668.56        | 11674.90 | 11677.82 | 11681.42 | 11683.41 |
| 4             | 11664.46        | 11672.75 | 11676.73 | 11682.40 | 11685.56 |
| 5             | 11668.38        | 11677.94 | 11684.11 | 11688.37 | 11694.21 |
| 6             | 11671.60        | 11683.56 | 11690.40 | 11696.14 | 11703.76 |

<sup>a</sup> Quasi Akaike Information Criterion, Q-AIC; its corresponding formula is as follows:  
Q-AIC =  $-2(\text{maximum log-likelihood}) + 2df*\hat{\phi}$ , where  $\hat{\phi}$  is the estimated overdispersion parameter.

**Table S2.** Quasi-Akaike information criterion (Q-AIC) <sup>a</sup> values for TCN-model.

| df for<br>TCN | df for TCN lag  |          |          |          |          |
|---------------|-----------------|----------|----------|----------|----------|
|               | 2               | 3        | 4        | 5        | 6        |
| 2             | <b>11617.30</b> | 11622.66 | 11626.89 | 11631.45 | 11633.25 |
| 3             | 11620.33        | 11625.39 | 11631.84 | 11638.71 | 11642.95 |
| 4             | 11623.62        | 11631.03 | 11639.00 | 11647.64 | 11654.21 |
| 5             | 11626.04        | 11627.95 | 11635.78 | 11646.73 | 11655.07 |
| 6             | 11618.19        | 11619.53 | 11629.69 | 11642.78 | 11652.39 |

<sup>a</sup> Quasi Akaike Information Criterion, Q-AIC; its corresponding formula is as follows:  
 $Q\text{-AIC} = -2(\text{maximum log-likelihood}) + 2df * \hat{\phi}$ , where  $\hat{\phi}$  is the estimated overdispersion parameter

**Table S3.** Spearman's correlation coefficients among different air pollutant concentrations and meteorological factors in Shenzhen from 2013 to 2017.

|                      | Apparent temperature | DTR    | TCN   | CO     | NO <sub>2</sub> | SO <sub>2</sub> | PM <sub>10</sub> | PM <sub>2.5</sub> | O <sub>3</sub> |
|----------------------|----------------------|--------|-------|--------|-----------------|-----------------|------------------|-------------------|----------------|
| Apparent temperature | 1.00                 | -0.09* | 0.07* | -0.44* | -0.34*          | -0.14*          | -0.48*           | -0.56*            | -0.07*         |
| DTR                  |                      | 1.00   | 0.33* | 0.11*  | 0.27*           | 0.42*           | 0.36*            | 0.31*             | 0.21*          |
| TCN                  |                      |        | 1.00  | -0.01  | 0.22*           | 0.21*           | 0.18*            | 0.14*             | 0.01           |
| CO                   |                      |        |       | 1.00   | 0.55*           | 0.30*           | 0.51*            | 0.54*             | -0.17*         |
| NO <sub>2</sub>      |                      |        |       |        | 1.00            | 0.56*           | 0.60*            | 0.59*             | -0.21*         |
| SO <sub>2</sub>      |                      |        |       |        |                 | 1.00            | 0.63*            | 0.57*             | 0.06*          |
| PM <sub>10</sub>     |                      |        |       |        |                 |                 | 1.00             | 0.96*             | 0.33*          |
| PM <sub>2.5</sub>    |                      |        |       |        |                 |                 |                  | 1.00              | 0.33*          |
| O <sub>3</sub>       |                      |        |       |        |                 |                 |                  |                   | 1.00           |

Abbreviations: DTR, diurnal temperature change; TCN, temperature change between neighboring days; CO, carbon monoxide; NO<sub>2</sub>, nitrogen dioxide; SO<sub>2</sub>, sulfur dioxide; PM<sub>10</sub>, particulate matter less than 10μm in aerodynamic diameter; PM<sub>2.5</sub>, particulate matter less than 2.5μm in aerodynamic diameter; O<sub>3</sub>, ozone.

\*  $p < 0.01$ .

**Table S4.** Relative risk (95% *CI*) of non-accidental mortality for extreme high DTR at single-day and cumulative lag periods by varying modeling choices.

|                          | Modeling choice           | Lag 0                     | Lag 3                     | Lag 0–5                    | Lag 0–7                    |
|--------------------------|---------------------------|---------------------------|---------------------------|----------------------------|----------------------------|
| Full year                |                           |                           |                           |                            |                            |
| Non-accidental mortality | Main model                | <b>1.032(1.008-1.056)</b> | 1.010(0.997-1.024)        | 1.086(0.999-1.180)         | 1.055(0.951-1.169)         |
| Cardiovascular mortality |                           | <b>1.037(1.002-1.074)</b> | 1.018(0.998-1.038)        | 1.133(0.999-1.286)         | 1.124(0.961-1.314)         |
| Respiratory mortality    |                           | 0.961(0.891-1.036)        | 0.986(0.948-1.025)        | 0.895(0.696-1.151)         | 0.924(0.683-1.250)         |
| Male                     |                           | 1.027(0.998-1.057)        | 1.008(0.992-1.025)        | 1.070(0.964-1.188)         | 1.043(0.917-1.187)         |
| Female                   |                           | <b>1.038(1.002-1.076)</b> | 1.013(0.992-1.034)        | 1.107(0.973-1.260)         | 1.072(0.913-1.259)         |
| ≥65 years old            |                           | 1.016(0.986-1.047)*       | 1.016(0.999-1.034)        | 1.102(0.989-1.229)         | 1.140(0.997-1.303)         |
| <65 years old            |                           | <b>1.044(1.011-1.077)</b> | 0.999(0.982-1.015)        | 1.036(0.933-1.152)         | 0.932(0.821-1.058)         |
| Non-accidental mortality | Df/year for time trend: 6 | <b>1.032(1.009-1.056)</b> | 1.010(0.997-1.023)        | <b>1.084(1.000-1.176)</b>  | 1.051(0.951-1.162)         |
| Cardiovascular mortality |                           | <b>1.038(1.003-1.075)</b> | 1.017(0.998-1.037)        | <b>1.130(1.000-1.278)</b>  | 1.115(0.958-1.298)         |
| Respiratory mortality    |                           | 0.993(0.922-1.069)        | 0.987(0.948-1.028)        | 0.930(0.718-1.206)         | 0.894(0.650-1.229)         |
| Male                     |                           | 1.026(0.997-1.056)        | 1.007(0.991-1.023)        | 1.063(0.960-1.177)         | 1.031(0.909-1.169)         |
| Female                   |                           | <b>1.041(1.004-1.078)</b> | 1.014(0.994-1.034)        | 1.115(0.984-1.265)         | 1.080(0.925-1.261)         |
| ≥65 years old            |                           | 1.014(0.984-1.044)*       | 1.013(0.997-1.030)        | 1.082(0.975-1.201)         | 1.109(0.976-1.261)         |
| <65 years old            |                           | <b>1.050(1.017-1.084)</b> | 1.002(0.986-1.018)        | 1.060(0.955-1.177)         | 0.954(0.842-1.082)         |
| Non-accidental mortality | Df/year for time trend: 8 | <b>1.031(1.008-1.055)</b> | 1.009(0.996-1.022)        | 1.078(0.992-1.172)         | 1.042(0.940-1.156)         |
| Cardiovascular mortality |                           | <b>1.038(1.002-1.075)</b> | 1.018(0.998-1.038)        | 1.133(0.998-1.288)         | 1.122(0.958-1.314)         |
| Respiratory mortality    |                           | 0.960(0.890-1.035)        | 0.984(0.947-1.024)        | 0.887(0.689-1.143)         | 0.913(0.673-1.238)         |
| Male                     |                           | 1.027(0.998-1.057)        | 1.008(0.991-1.024)        | 1.067(0.960-1.185)         | 1.036(0.909-1.180)         |
| Female                   |                           | <b>1.038(1.002-1.075)</b> | 1.011(0.991-1.031)        | 1.095(0.966-1.242)         | 1.052(0.900-1.229)         |
| ≥65 years old            |                           | 1.014(0.984-1.045)*       | 1.015(0.997-1.032)        | 1.090(0.978-1.215)         | 1.123(0.982-1.283)         |
| <65 years old            |                           | <b>1.055(1.023-1.088)</b> | 1.001(0.984-1.019)        | 1.062(0.951-1.185)         | 0.942(0.822-1.080)         |
| Cold season              |                           |                           |                           |                            |                            |
| Non-accidental mortality | Main model                | <b>1.063(1.027-1.100)</b> | <b>1.046(1.029-1.064)</b> | <b>1.333(1.192-1.491)</b>  | <b>1.407(1.233-1.606)</b>  |
| Cardiovascular mortality |                           | <b>1.066(1.015-1.119)</b> | <b>1.052(1.027-1.077)</b> | <b>1.371(1.171-1.606)</b>  | <b>1.470(1.220-1.771)</b>  |
| Respiratory mortality    |                           | 1.077(0.969-1.198)        | <b>1.073(1.017-1.131)</b> | <b>1.529(1.082-2.162)</b>  | <b>1.741(1.157-2.620)</b>  |
| Male                     |                           | <b>1.051(1.009-1.095)</b> | <b>1.036(1.016-1.057)</b> | <b>1.256(1.100-1.434)*</b> | <b>1.306(1.118-1.527)*</b> |
| Female                   |                           | <b>1.082(1.031-1.137)</b> | <b>1.063(1.037-1.089)</b> | <b>1.467(1.250-1.721)</b>  | <b>1.587(1.314-1.917)</b>  |

|                          |                     |                           |                           |                             |                            |
|--------------------------|---------------------|---------------------------|---------------------------|-----------------------------|----------------------------|
| ≥65 years old            |                     | 1.030(0.987-1.075)*       | <b>1.052(1.031-1.075)</b> | <b>1.330(1.158-1.527)</b>   | <b>1.548(1.317-1.820)*</b> |
| <65 years old            |                     | <b>1.107(1.056-1.160)</b> | <b>1.038(1.014-1.062)</b> | <b>1.333(1.144-1.553)</b>   | <b>1.235(1.028-1.482)</b>  |
| Non-accidental mortality |                     | <b>1.061(1.024-1.099)</b> | <b>1.045(1.027-1.063)</b> | <b>1.322(1.179-1.482)</b>   | <b>1.394(1.218-1.595)</b>  |
| Cardiovascular mortality |                     | <b>1.065(1.014-1.118)</b> | <b>1.051(1.026-1.076)</b> | <b>1.363(1.164-1.598)</b>   | <b>1.458(1.209-1.759)</b>  |
| Respiratory mortality    |                     | 1.077(0.966-1.201)        | <b>1.071(1.014-1.131)</b> | <b>1.517(1.063-2.165)</b>   | <b>1.716(1.128-2.612)</b>  |
| Male                     | Df for time trend:2 | <b>1.049(1.006-1.093)</b> | <b>1.035(1.014-1.057)</b> | <b>1.246(1.088-1.4260*)</b> | <b>1.294(1.103-1.517)*</b> |
| Female                   |                     | <b>1.081(1.028-1.136)</b> | <b>1.061(1.035-1.088)</b> | <b>1.455(1.237-1.711)</b>   | <b>1.570(1.296-1.902)</b>  |
| ≥65 years old            |                     | 1.028(0.984-1.074)*       | <b>1.051(1.029-1.074)</b> | <b>1.319(1.146-1.518)</b>   | <b>1.534(1.301-1.809)*</b> |
| <65 years old            |                     | <b>1.105(1.054-1.159)</b> | <b>1.036(1.012-1.061)</b> | <b>1.322(1.132-1.543)</b>   | <b>1.222(1.015-1.471)</b>  |
| Non-accidental mortality |                     | <b>1.056(1.021-1.093)</b> | <b>1.041(1.024-1.059)</b> | <b>1.294(1.157-1.448)</b>   | <b>1.358(1.189-1.551)</b>  |
| Cardiovascular mortality | Df for time trend:4 | <b>1.061(1.011-1.114)</b> | <b>1.047(1.022-1.073)</b> | <b>1.337(1.141-1.567)</b>   | <b>1.423(1.179-1.717)</b>  |
| Respiratory mortality    |                     | 1.075(0.966-1.196)        | <b>1.071(1.015-1.129)</b> | <b>1.512(1.067-2.143)</b>   | <b>1.716(1.136-2.592)</b>  |
| Male                     |                     | <b>1.046(1.004-1.090)</b> | <b>1.033(1.012-1.054)</b> | <b>1.228(1.075-1.403)</b>   | <b>1.270(1.086-1.486)</b>  |
| Female                   |                     | <b>1.074(1.023-1.128)</b> | <b>1.056(1.030-1.082)</b> | <b>1.411(1.201-1.657)</b>   | <b>1.511(1.249-1.829)</b>  |
| ≥65 years old            |                     | 1.024(0.981-1.069)*       | <b>1.048(1.025-1.070)</b> | <b>1.292(1.123-1.486)</b>   | <b>1.495(1.269-1.762)*</b> |
| <65 years old            |                     | <b>1.100(1.050-1.153)</b> | <b>1.033(1.009-1.057)</b> | <b>1.293(1.108-1.507)</b>   | 1.190(0.990-1.431)         |
| Warm season              |                     |                           |                           |                             |                            |
| Non-accidental mortality |                     | 1.014(0.991-1.038)        | 1.003(0.991-1.015)        | 1.028(0.952-1.110)          | 1.007(0.920-1.101)         |
| Cardiovascular mortality |                     | 1.031(0.984-1.080)        | 1.006(0.983-1.029)        | 1.063(0.914-1.236)          | 1.016(0.851-1.213)         |
| Respiratory mortality    |                     | 0.999(0.901-1.108)        | 1.016(0.967-1.069)        | 1.084(0.778-1.511)          | 1.165(0.796-1.706)         |
| Male                     | Main model          | 1.018(0.983-1.054)        | 1.006(0.989-1.023)        | 1.048(0.935-1.174)          | 1.031(0.903-1.177)         |
| Female                   |                     | 1.016(0.968-1.066)        | 0.998(0.975-1.022)        | 1.007(0.860-1.178)          | 0.963(0.802-1.157)         |
| ≥65 years old            |                     | 1.039(0.999-1.080)        | 1.013(0.994-1.033)        | 1.108(0.977-1.257)          | 1.073(0.926-1.243)         |
| <65 years old            |                     | 0.992(0.950-1.036)        | 0.991(0.970-1.012)        | 0.948(0.824-1.091)          | 0.928(0.788-1.093)         |
| Non-accidental mortality |                     | 1.015(0.991-1.039)        | 1.003(0.991-1.015)        | 1.029(0.953-1.111)          | 1.008(0.921-1.102)         |
| Cardiovascular mortality |                     | 1.030(0.985-1.078)        | 1.006(0.984-1.029)        | 1.061(0.915-1.230)          | 1.015(0.854-1.207)         |
| Respiratory mortality    |                     | 1.002(0.904-1.111)        | 1.017(0.968-1.069)        | 1.091(0.784-1.519)          | 1.170(0.801-1.711)         |
| Male                     | Df for time trend:2 | 1.018(0.983-1.054)        | 1.006(0.989-1.023)        | 1.049(0.936-1.175)          | 1.032(0.904-1.178)         |
| Female                   |                     | 1.016(0.968-1.067)        | 0.998(0.975-1.022)        | 1.007(0.860-1.178)          | 0.962(0.801-1.155)         |
| ≥65 years old            |                     | 1.039(0.998-1.081)        | 1.013(0.993-1.033)        | 1.109(0.974-1.261)          | 1.073(0.923-1.248)         |
| <65 years old            |                     | 0.994(0.952-1.038)        | 0.991(0.970-1.012)        | 0.950(0.825-1.093)          | 0.927(0.787-1.092)         |
| Non-accidental mortality | Df for time         | 1.017(0.990-1.044)        | 1.004(0.991-1.017)        | 1.036(0.950-1.129)          | 1.013(0.916-1.120)         |

|                          |         |                           |                    |                    |                    |
|--------------------------|---------|---------------------------|--------------------|--------------------|--------------------|
| Cardiovascular mortality | trend:4 | 1.035(0.988-1.085)        | 1.010(0.986-1.033) | 1.085(0.931-1.265) | 1.044(0.872-1.249) |
| Respiratory mortality    |         | 0.998(0.899-1.107)        | 1.014(0.965-1.067) | 1.072(0.767-1.497) | 1.147(0.781-1.685) |
| Male                     |         | 1.020(0.984-1.057)        | 1.007(0.990-1.026) | 1.058(0.940-1.190) | 1.044(0.909-1.198) |
| Female                   |         | 1.015(0.967-1.066)        | 0.998(0.974-1.022) | 1.004(0.857-1.176) | 0.959(0.797-1.154) |
| ≥65 years old            |         | <b>1.040(1.000-1.082)</b> | 1.014(0.995-1.034) | 1.117(0.981-1.271) | 1.083(0.931-1.260) |
| <65 years old            |         | 0.993(0.951-1.037)        | 0.991(0.970-1.013) | 0.951(0.826-1.095) | 0.931(0.790-1.098) |

Bold values represent statistically significant results ( $p < 0.05$ ).

\* Significant results of Z tests for the difference between the two relative risks of subgroup analysis ( $p < 0.05$ ).

The 99th percentile of DTR distribution (10.8 °C for the full year, 11.5 °C for the cold season and 8.8 °C for the warm season) with reference to the minimum relative risk in each subgroup.

**Table S5.** Relative risk (95% *CI*) of non-accidental mortality for extreme high DTR at single-day and cumulative lag periods with adjustment for the TCN variable.

|                          | Lag 0                     | Lag 3                     | Lag 0–5                   | Lag 0–7                    |
|--------------------------|---------------------------|---------------------------|---------------------------|----------------------------|
| Full year                |                           |                           |                           |                            |
| Non-accidental mortality | <b>1.029(1.005-1.053)</b> | 1.010(0.996-1.023)        | 1.079(0.992-1.174)        | 1.054(0.950-1.169)         |
| Cardiovascular mortality | 1.032(0.996-1.070)        | 1.017(0.997-1.038)        | 1.125(0.991-1.278)        | 1.126(0.962-1.318)         |
| Respiratory mortality    | 0.957(0.886-1.033)        | 0.982(0.944-1.021)        | 0.874(0.677-1.127)        | 0.896(0.659-1.217)         |
| Male                     | 1.024(0.994-1.054)        | 1.008(0.991-1.025)        | 1.065(0.959-1.184)        | 1.045(0.917-1.190)         |
| Female                   | 1.036(0.999-1.074)        | 1.012(0.992-1.033)        | 1.100(0.965-1.253)        | 1.066(0.908-1.253)         |
| ≥65 years old            | 1.013(0.983-1.045)*       | 1.016(0.998-1.033)        | 1.094(0.981-1.221)        | 1.135(0.992-1.298)         |
| <65 years old            | <b>1.042(1.010-1.076)</b> | 1.000(0.984-1.017)        | 1.042(0.937-1.160)        | 0.947(0.833-1.076)         |
| Cold season              |                           |                           |                           |                            |
| Non-accidental mortality | <b>1.053(1.016-1.091)</b> | <b>1.043(1.025-1.062)</b> | <b>1.302(1.161-1.459)</b> | <b>1.387(1.214-1.585)</b>  |
| Cardiovascular mortality | 1.050(0.999-1.103)        | <b>1.046(1.021-1.072)</b> | <b>1.318(1.123-1.546)</b> | <b>1.432(1.189-1.726)</b>  |
| Respiratory mortality    | 1.072(0.960-1.196)        | <b>1.070(1.014-1.129)</b> | <b>1.504(1.055-2.145)</b> | <b>1.717(1.135-2.597)</b>  |
| Male                     | 1.041(0.999-1.086)        | <b>1.034(1.013-1.055)</b> | <b>1.228(1.074-1.405)</b> | <b>1.290(1.104-1.507)</b>  |
| Female                   | <b>1.073(1.020-1.129)</b> | <b>1.059(1.033-1.086)</b> | <b>1.432(1.216-1.687)</b> | <b>1.560(1.289-1.889)</b>  |
| ≥65 years old            | 1.020(0.976-1.066)*       | <b>1.049(1.027-1.072)</b> | <b>1.294(1.123-1.491)</b> | <b>1.521(1.292-1.791)*</b> |
| <65 years old            | <b>1.099(1.047-1.153)</b> | <b>1.035(1.011-1.060)</b> | <b>1.308(1.119-1.529)</b> | <b>1.221(1.016-1.468)</b>  |
| Warm season              |                           |                           |                           |                            |
| Non-accidental mortality | 0.981(0.945-1.019)        | 0.998(0.979-1.017)        | 0.970(0.857-1.098)        | 1.004(0.868-1.161)         |
| Cardiovascular mortality | 1.020(0.982-1.060)        | 1.003(0.984-1.022)        | 1.034(0.913-1.172)        | 0.999(0.863-1.156)         |
| Respiratory mortality    | 0.993(0.898-1.097)        | 1.012(0.963-1.062)        | 1.051(0.761-1.452)        | 1.124(0.775-1.628)         |
| Male                     | 1.018(0.983-1.054)        | 1.006(0.988-1.023)        | 1.047(0.933-1.174)        | 1.030(0.900-1.178)         |
| Female                   | 1.007(0.960-1.057)        | 0.993(0.970-1.017)        | 0.974(0.832-1.140)        | 0.931(0.775-1.118)         |
| ≥65 years old            | 1.035(0.996-1.077)        | 1.011(0.992-1.031)        | 1.095(0.963-1.244)        | 1.059(0.912-1.229)         |
| <65 years old            | 0.989(0.947-1.032)        | 0.989(0.968-1.010)        | 0.936(0.813-1.077)        | 0.915(0.777-1.078)         |

Bold values represent statistically significant results ( $p < 0.05$ ).

\* Significant results of Z tests for the difference between the two relative risks of subgroup analysis ( $p < 0.05$ ).

The 99th percentile of DTR distribution (10.8 °C for the full year, 11.5 °C for the cold season and 8.8 °C for the warm season) with reference to the minimum relative risk in each subgroup.

**Table S6.** Relative risk (95% *CI*) of non-accidental mortality for extreme high DTR at single-day and cumulative lag periods with adjustment for co-pollutants.

| Pollutants                                                                 |                          | Lag 0                     | Lag 3                     | Lag 0–5                   | Lag 0–7                    |
|----------------------------------------------------------------------------|--------------------------|---------------------------|---------------------------|---------------------------|----------------------------|
| NO <sub>2</sub> +PM <sub>10</sub> +CO<br>+SO <sub>2</sub> +O <sub>3</sub>  | Full year                |                           |                           |                           |                            |
|                                                                            | Non-accidental mortality | 1.012(0.991-1.033)        | 1.003(0.992-1.015)        | 1.029(0.955-1.108)        | 1.015(0.928-1.111)         |
|                                                                            | Cardiovascular mortality | 1.019(0.983-1.057)        | 1.013(0.993-1.034)        | 1.089(0.957-1.240)        | 1.104(0.943-1.291)         |
|                                                                            | Respiratory mortality    | 0.944(0.862-1.034)        | 0.980(0.937-1.025)        | 0.853(0.632-1.152)        | 0.893(0.639-1.249)         |
|                                                                            | Male                     | 1.002(0.992-1.012)        | 1.000(0.995-1.006)        | 1.004(0.968-1.041)        | 1.000(0.958-1.045)         |
|                                                                            | Female                   | 1.025(0.988-1.062)        | 1.008(0.988-1.029)        | 1.068(0.937-1.216)        | 1.045(0.893-1.224)         |
|                                                                            | ≥65 years old            | 1.003(0.971-1.036)        | 1.012(0.994-1.030)        | 1.063(0.947-1.195)        | 1.110(0.966-1.276)         |
|                                                                            | <65 years old            | 0.967(0.925-1.010)        | 1.007(0.982-1.032)        | 1.001(0.855-1.173)        | 1.116(0.920-1.354)         |
|                                                                            | Cold season              |                           |                           |                           |                            |
|                                                                            | Non-accidental mortality | 1.025(0.987-1.065)        | <b>1.032(1.013-1.052)</b> | <b>1.201(1.061-1.360)</b> | <b>1.300(1.128-1.498)</b>  |
|                                                                            | Cardiovascular mortality | 1.013(0.959-1.069)        | <b>1.035(1.008-1.063)</b> | <b>1.201(1.008-1.432)</b> | <b>1.353(1.107-1.654)</b>  |
|                                                                            | Respiratory mortality    | 1.047(0.934-1.174)        | 1.052(0.995-1.113)        | 1.351(0.929-1.964)        | 1.514(0.987-2.324)         |
|                                                                            | Male                     | 1.007(0.961-1.054)        | 1.019(0.996-1.042)*       | 1.105(0.952-1.283)*       | 1.180(0.996-1.398)*        |
|                                                                            | Female                   | 1.055(0.999-1.115)        | <b>1.054(1.026-1.082)</b> | <b>1.372(1.149-1.639)</b> | <b>1.520(1.240-1.862)</b>  |
|                                                                            | ≥65 years old            | 1.003(0.956-1.053)        | <b>1.041(1.017-1.066)</b> | <b>1.227(1.049-1.434)</b> | <b>1.450(1.216-1.730)*</b> |
|                                                                            | <65 years old            | 1.055(1.003-1.110)        | 1.020(0.995-1.046)        | 1.165(0.987-1.376)        | 1.121(0.925-1.359)         |
|                                                                            | Warm season              |                           |                           |                           |                            |
|                                                                            | Non-accidental mortality | 1.059(0.982-1.142)        | 1.017(0.979-1.057)        | 1.153(0.897-1.482)        | 1.085(0.809-1.454)         |
|                                                                            | Cardiovascular mortality | 1.092(0.967-1.232)        | 1.023(0.962-1.088)        | 1.225(0.818-1.836)        | 1.104(0.688-1.771)         |
|                                                                            | Respiratory mortality    | 1.037(0.773-1.391)        | 1.080(0.934-1.248)        | 1.522(0.584-3.969)        | 1.950(0.649-5.856)         |
|                                                                            | Male                     | 1.071(0.971-1.180)        | 1.027(0.978-1.079)        | 1.226(0.887-1.695)        | 1.176(0.806-1.716)         |
|                                                                            | Female                   | 1.005(0.990-1.020)        | 1.000(0.992-1.008)        | 1.005(0.956-1.057)        | 0.994(0.937-1.054)         |
|                                                                            | ≥65 years old            | <b>1.140(1.025-1.267)</b> | 1.054(0.999-1.111)        | <b>1.480(1.042-2.102)</b> | 1.367(0.908-2.059)         |
|                                                                            | <65 years old            | 0.972(0.867-1.090)        | 0.975(0.920-1.033)        | 0.857(0.585-1.254)        | 0.819(0.526-1.276)         |
| NO <sub>2</sub> +PM <sub>2.5</sub> +CO<br>+SO <sub>2</sub> +O <sub>3</sub> | Full year                |                           |                           |                           |                            |
|                                                                            | Non-accidental mortality | 1.015(0.993-1.038)        | 1.004(0.992-1.017)        | 1.037(0.958-1.123)        | 1.021(0.927-1.124)         |
|                                                                            | Cardiovascular mortality | 1.022(0.985-1.060)        | 1.014(0.993-1.035)        | 1.096(0.961-1.250)        | 1.106(0.943-1.297)         |
|                                                                            | Respiratory mortality    | 0.952(0.869-1.042)        | 0.983(0.940-1.028)        | 0.872(0.647-1.175)        | 0.908(0.650-1.267)         |

|                          |                           |                           |                           |                            |
|--------------------------|---------------------------|---------------------------|---------------------------|----------------------------|
| Male                     | 1.004(0.991-1.018)        | 1.001(0.993-1.008)        | 1.008(0.959-1.058)        | 1.001(0.943-1.062)         |
| Female                   | 1.027(0.990-1.066)        | 1.010(0.989-1.031)        | 1.080(0.946-1.232)        | 1.059(0.902-1.243)         |
| ≥65 years old            | 1.006(0.974-1.039)        | 1.013(0.995-1.032)        | 1.074(0.956-1.206)        | 1.121(0.975-1.289)         |
| <65 years old            | 1.019(0.984-1.056)        | 0.989(0.971-1.007)        | 0.964(0.857-1.084)        | 0.878(0.768-1.004)         |
| <hr/>                    |                           |                           |                           |                            |
| Cold season              |                           |                           |                           |                            |
| Non-accidental mortality | 1.027(0.988-1.067)        | <b>1.033(1.014-1.053)</b> | <b>1.209(1.068-1.369)</b> | <b>1.310(1.137-1.509)</b>  |
| Cardiovascular mortality | 1.015(0.962-1.071)        | <b>1.035(1.008-1.063)</b> | <b>1.206(1.012-1.437)</b> | <b>1.352(1.107-1.652)</b>  |
| Respiratory mortality    | 1.050(0.936-1.178)        | 1.055(0.997-1.116)        | 1.373(0.945-1.996)        | <b>1.545(1.008-2.369)</b>  |
| Male                     | 1.009(0.964-1.056)        | 1.020(0.997-1.043)*       | 1.114(0.960-1.293)*       | <b>1.189(1.004-1.408)*</b> |
| Female                   | 1.055(0.999-1.115)        | <b>1.055(1.027-1.083)</b> | <b>1.377(1.153-1.644)</b> | <b>1.528(1.249-1.871)</b>  |
| ≥65 years old            | 1.006(0.959-1.056)        | <b>1.043(1.019-1.068)</b> | <b>1.244(1.064-1.454)</b> | <b>1.474(1.237-1.757)*</b> |
| <65 years old            | 1.054(1.002-1.109)        | 1.020(0.994-1.046)        | 1.162(0.984-1.371)        | 1.117(0.922-1.353)         |
| <hr/>                    |                           |                           |                           |                            |
| Warm season              |                           |                           |                           |                            |
| Non-accidental mortality | 1.058(0.981-1.141)        | 1.016(0.978-1.055)        | 1.145(0.890-1.472)        | 1.074(0.801-1.439)         |
| Cardiovascular mortality | 1.087(0.963-1.228)        | 1.022(0.961-1.087)        | 1.211(0.808-1.814)        | 1.093(0.681-1.754)         |
| Respiratory mortality    | 1.040(0.776-1.395)        | 1.078(0.933-1.246)        | 1.518(0.583-3.956)        | 1.920(0.640-5.762)         |
| Male                     | 1.069(0.969-1.178)        | 1.025(0.975-1.077)        | 1.208(0.873-1.670)        | 1.150(0.788-1.679)         |
| Female                   | 1.005(0.990-1.020)        | 1.000(0.993-1.008)        | 1.006(0.957-1.058)        | 0.995(0.938-1.055)         |
| ≥65 years old            | <b>1.139(1.024-1.266)</b> | 1.054(0.999-1.111)        | <b>1.479(1.042-2.101)</b> | 1.370(0.910-2.062)         |
| <65 years old            | 0.971(0.866-1.089)        | 0.972(0.917-1.030)        | 0.844(0.577-1.235)        | 0.799(0.513-1.245)         |

Bold values represent statistically significant results ( $p < 0.05$ ).

\* Significant results of Z tests for the difference between the two relative risks of subgroup analysis ( $p < 0.05$ ).

The 99th percentile of DTR distribution (10.8 °C for the full year, 11.5 °C for the cold season and 8.8 °C for the warm season) with reference to the minimum relative risk in each subgroup.

**Table S7.** Relative risk (95% *CI*) of non-accidental mortality for extreme high DTR at single-day and cumulative lag periods with adjustment for apparent temperature.

| Apparent Temperature |                          | Lag 0                     | Lag 3                     | Lag 0–5                    | Lag 0–7                    |
|----------------------|--------------------------|---------------------------|---------------------------|----------------------------|----------------------------|
| Df = 2               | Full year                |                           |                           |                            |                            |
|                      | Non-accidental mortality | <b>1.032(1.009-1.056)</b> | 1.011(0.997-1.024)        | <b>1.088(1.001-1.182)</b>  | 1.057(0.954-1.172)         |
|                      | Cardiovascular mortality | <b>1.040(1.004-1.076)</b> | 1.019(0.999-1.040)        | <b>1.143(1.008-1.297)</b>  | 1.134(0.970-1.326)         |
|                      | Respiratory mortality    | 0.958(0.889-1.033)        | 0.986(0.948-1.025)        | 0.891(0.693-1.146)         | 0.924(0.683-1.251)         |
|                      | Male                     | 1.027(0.998-1.057)        | 1.009(0.992-1.025)        | 1.073(0.966-1.191)         | 1.045(0.919-1.189)         |
|                      | Female                   | <b>1.039(1.002-1.076)</b> | 1.013(0.993-1.034)        | 1.109(0.975-1.262)         | 1.074(0.916-1.261)         |
|                      | ≥65 years old            | 1.017(0.987-1.048)*       | <b>1.017(1.000-1.035)</b> | 1.108(0.994-1.235)         | <b>1.145(1.002-1.309)</b>  |
|                      | <65 years old            | <b>1.044(1.011-1.077)</b> | 0.999(0.982-1.015)        | 1.036(0.932-1.151)         | 0.932(0.821-1.058)         |
|                      | Cold season              |                           |                           |                            |                            |
|                      | Non-accidental mortality | <b>1.063(1.027-1.100)</b> | <b>1.046(1.029-1.064)</b> | <b>1.332(1.192-1.490)</b>  | <b>1.404(1.231-1.602)</b>  |
|                      | Cardiovascular mortality | <b>1.065(1.015-1.118)</b> | <b>1.052(1.027-1.078)</b> | <b>1.374(1.174-1.609)</b>  | <b>1.480(1.228-1.783)</b>  |
|                      | Respiratory mortality    | 1.078(0.969-1.198)        | <b>1.072(1.017-1.131)</b> | <b>1.529(1.082-2.161)</b>  | <b>1.738(1.157-2.612)</b>  |
|                      | Male                     | <b>1.050(1.008-1.094)</b> | <b>1.037(1.016-1.058)</b> | <b>1.257(1.101-1.435)*</b> | <b>1.309(1.120-1.529)*</b> |
|                      | Female                   | <b>1.084(1.032-1.138)</b> | <b>1.062(1.036-1.088)</b> | <b>1.463(1.247-1.716)</b>  | <b>1.572(1.301-1.898)</b>  |
|                      | ≥65 years old            | 1.031(0.988-1.075)*       | <b>1.052(1.030-1.075)</b> | <b>1.329(1.158-1.526)</b>  | <b>1.545(1.315-1.815)*</b> |
|                      | <65 years old            | <b>1.107(1.057-1.161)</b> | <b>1.038(1.014-1.062)</b> | <b>1.332(1.143-1.552)</b>  | <b>1.232(1.027-1.479)</b>  |
|                      | Warm season              |                           |                           |                            |                            |
|                      | Non-accidental mortality | 1.017(0.991-1.044)        | 1.004(0.991-1.016)        | 1.035(0.952-1.126)         | 1.010(0.915-1.115)         |
|                      | Cardiovascular mortality | 1.038(0.991-1.087)        | 1.009(0.986-1.032)        | 1.083(0.931-1.258)         | 1.031(0.863-1.231)         |
|                      | Respiratory mortality    | 0.993(0.897-1.099)        | 1.014(0.965-1.065)        | 1.063(0.767-1.472)         | 1.146(0.785-1.673)         |
|                      | Male                     | 1.021(0.986-1.058)        | 1.007(0.990-1.025)        | 1.059(0.944-1.188)         | 1.039(0.908-1.190)         |
|                      | Female                   | 1.014(0.967-1.064)        | 0.998(0.974-1.021)        | 1.002(0.859-1.169)         | 0.959(0.800-1.150)         |
|                      | ≥65 years old            | 1.037(0.999-1.077)        | 1.012(0.994-1.032)        | 1.104(0.975-1.249)         | 1.069(0.924-1.237)         |
|                      | <65 years old            | 0.997(0.956-1.040)        | 0.993(0.973-1.014)        | 0.963(0.840-1.104)         | 0.941(0.801-1.105)         |
| Df = 4               | Full year                |                           |                           |                            |                            |
|                      | Non-accidental mortality | <b>1.032(1.008-1.056)</b> | 1.010(0.997-1.024)        | 1.085(0.998-1.180)         | 1.054(0.951-1.169)         |
|                      | Cardiovascular mortality | <b>1.037(1.002-1.074)</b> | 1.017(0.997-1.038)        | 1.130(0.997-1.282)         | 1.118(0.956-1.307)         |

|                          |                           |                           |                            |                            |
|--------------------------|---------------------------|---------------------------|----------------------------|----------------------------|
| Respiratory mortality    | 0.961(0.891-1.036)        | 0.986(0.948-1.025)        | 0.895(0.696-1.152)         | 0.924(0.682-1.251)         |
| Male                     | 1.027(0.998-1.057)        | 1.008(0.992-1.025)        | 1.068(0.962-1.186)         | 1.040(0.914-1.183)         |
| Female                   | <b>1.039(1.002-1.076)</b> | 1.013(0.993-1.034)        | 1.111(0.976-1.264)         | 1.077(0.918-1.265)         |
| ≥65 years old            | 1.016(0.986-1.047)*       | 1.017(0.999-1.034)        | 1.103(0.989-1.230)         | 1.141(0.998-1.305)         |
| <65 years old            | <b>1.044(1.011-1.077)</b> | 0.998(0.982-1.015)        | 1.034(0.930-1.149)         | 0.929(0.818-1.055)         |
| Cold season              |                           |                           |                            |                            |
| Non-accidental mortality | <b>1.062(1.026-1.100)</b> | <b>1.047(1.029-1.065)</b> | <b>1.334(1.193-1.492)</b>  | <b>1.410(1.236-1.609)</b>  |
| Cardiovascular mortality | <b>1.066(1.015-1.119)</b> | <b>1.052(1.027-1.078)</b> | <b>1.373(1.172-1.608)</b>  | <b>1.473(1.222-1.776)</b>  |
| Respiratory mortality    | 1.076(0.968-1.197)        | <b>1.073(1.018-1.131)</b> | <b>1.531(1.082-2.166)</b>  | <b>1.749(1.162-2.633)</b>  |
| Male                     | <b>1.050(1.008-1.094)</b> | <b>1.037(1.016-1.058)</b> | <b>1.257(1.101-1.435)*</b> | <b>1.310(1.120-1.531)*</b> |
| Female                   | <b>1.082(1.030-1.137)</b> | <b>1.063(1.037-1.089)</b> | <b>1.468(1.251-1.722)</b>  | <b>1.589(1.316-1.920)</b>  |
| ≥65 years old            | 1.030(0.987-1.075)*       | <b>1.053(1.031-1.075)</b> | <b>1.331(1.159-1.528)</b>  | <b>1.551(1.320-1.823)*</b> |
| <65 years old            | <b>1.107(1.056-1.160)</b> | <b>1.038(1.014-1.063)</b> | <b>1.334(1.145-1.555)</b>  | <b>1.238(1.031-1.487)</b>  |
| Warm season              |                           |                           |                            |                            |
| Non-accidental mortality | 1.014(0.991-1.038)        | 1.003(0.991-1.015)        | 1.028(0.952-1.111)         | 1.007(0.920-1.102)         |
| Cardiovascular mortality | 1.030(0.984-1.077)        | 1.006(0.983-1.029)        | 1.060(0.914-1.229)         | 1.015(0.853-1.207)         |
| Respiratory mortality    | 0.999(0.901-1.108)        | 1.016(0.967-1.069)        | 1.084(0.778-1.512)         | 1.166(0.796-1.708)         |
| Male                     | 1.018(0.983-1.054)        | 1.006(0.988-1.023)        | 1.047(0.935-1.173)         | 1.030(0.902-1.177)         |
| Female                   | 1.015(0.967-1.066)        | 0.998(0.975-1.023)        | 1.007(0.861-1.179)         | 0.966(0.804-1.160)         |
| ≥65 years old            | 1.038(0.999-1.080)        | 1.013(0.994-1.032)        | 1.106(0.975-1.255)         | 1.070(0.924-1.241)         |
| <65 years old            | 0.992(0.950-1.036)        | 0.991(0.970-1.013)        | 0.950(0.826-1.094)         | 0.932(0.792-1.098)         |

Bold values represent statistically significant results ( $p < 0.05$ ).

\* Significant results of Z tests for the difference between the two relative risks of subgroup analysis ( $p < 0.05$ ).

The 99th percentile of DTR distribution (10.8 °C for the full year, 11.5 °C for the cold season and 8.8 °C for the warm season) with reference to the minimum relative risk in each subgroup.

**Table S8.** Relative risk (95% *CI*) of non-accidental mortality for extreme high DTR at single-day and cumulative lag periods with adjustment for lag periods.

|                     |                          | <b>Lag 0</b>              | <b>Lag3</b>               | <b>Lag 0-5</b>            | <b>Lag 0-7</b>     |
|---------------------|--------------------------|---------------------------|---------------------------|---------------------------|--------------------|
| Lag period: 5 days  | Full year                |                           |                           |                           |                    |
|                     | Non-accidental mortality | <b>1.032(1.004-1.060)</b> | 1.012(0.996-1.027)        | <b>1.093(1.001-1.192)</b> |                    |
|                     | Cardiovascular mortality | <b>1.048(1.006-1.092)</b> | 1.014(0.991-1.038)        | 1.125(0.985-1.284)        |                    |
|                     | Respiratory mortality    | 1.024(0.945-1.109)        | 0.998(0.952-1.045)        | 1.011(0.777-1.315)        |                    |
|                     | Male                     | 1.019(0.985-1.054)        | 1.014(0.995-1.034)        | 1.095(0.980-1.222)        |                    |
|                     | Female                   | <b>1.052(1.009-1.096)</b> | 1.007(0.983-1.031)        | 1.087(0.951-1.242)        |                    |
|                     | ≥65 years old            | 1.017(0.983-1.053)        | 1.017(0.997-1.036)        | 1.104(0.989-1.232)        |                    |
|                     | <65 years old            | <b>1.050(1.010-1.092)</b> | 1.006(0.983-1.029)        | 1.081(0.953-1.227)        |                    |
|                     | Cold season              |                           |                           |                           |                    |
|                     | Non-accidental mortality | <b>1.048(1.006-1.092)</b> | <b>1.056(1.034-1.078)</b> | <b>1.375(1.224-1.544)</b> |                    |
|                     | Cardiovascular mortality | <b>1.064(1.004-1.127)</b> | <b>1.057(1.027-1.088)</b> | <b>1.405(1.194-1.654)</b> |                    |
|                     | Respiratory mortality    | 1.072(0.943-1.218)        | <b>1.082(1.014-1.154)</b> | <b>1.587(1.104-2.283)</b> |                    |
|                     | Male                     | 1.029(0.980-1.080)        | <b>1.048(1.023-1.074)</b> | <b>1.302(1.135-1.494)</b> |                    |
|                     | Female                   | <b>1.080(1.018-1.146)</b> | <b>1.068(1.036-1.100)</b> | <b>1.498(1.267-1.771)</b> |                    |
|                     | ≥65 years old            | 1.021(0.970-1.075)        | <b>1.065(1.038-1.092)</b> | <b>1.398(1.213-1.611)</b> |                    |
|                     | <65 years old            | <b>1.083(1.024-1.147)</b> | <b>1.045(1.015-1.075)</b> | <b>1.349(1.147-1.585)</b> |                    |
|                     | Warm season              |                           |                           |                           |                    |
|                     | Non-accidental mortality | 0.985(0.970-0.999)        | 1.003(0.996-1.011)        | 1.000(0.957-1.045)        |                    |
|                     | Cardiovascular mortality | 1.019(0.957-1.084)        | 1.005(0.973-1.038)        | 1.042(0.869-1.250)        |                    |
|                     | Respiratory mortality    | 0.957(0.847-1.081)        | 1.026(0.967-1.089)        | 1.090(0.773-1.538)        |                    |
|                     | Male                     | 1.030(0.991-1.071)        | 0.998(0.978-1.018)        | 1.019(0.910-1.142)        |                    |
|                     | Female                   | 1.041(0.985-1.101)        | 0.983(0.955-1.012)        | 0.957(0.813-1.125)        |                    |
|                     | ≥65 years old            | <b>1.059(1.012-1.108)</b> | 1.002(0.979-1.025)        | 1.067(0.936-1.218)        |                    |
|                     | <65 years old            | 1.007(0.958-1.059)        | 0.981(0.957-1.007)        | 0.916(0.792-1.059)        |                    |
| Lag period: 14 days | Full year                |                           |                           |                           |                    |
|                     | Non-accidental mortality | <b>1.014(1.000-1.029)</b> | 1.005(0.994-1.016)        | 1.039(0.972-1.111))       | 1.026(0.947-1.112) |
|                     | Cardiovascular mortality | 1.018(0.995-1.041)        | 1.006(0.989-1.023)        | 1.049(0.944-1.166)        | 1.033(0.910-1.173) |
|                     | Respiratory mortality    | 1.009(0.951-1.070)        | 0.995(0.952-1.040)        | 0.984(0.743-1.302)        | 0.943(0.670-1.328) |

|                          |                            |                            |                            |                            |
|--------------------------|----------------------------|----------------------------|----------------------------|----------------------------|
| Male                     | 1.012(0.992-1.033)         | 1.004(0.989-1.019)         | 1.032(0.939-1.134)         | 1.020(0.910-1.144)         |
| Female                   | 1.017(0.994-1.041)         | 1.006(0.989-1.023)         | 1.047(0.941-1.166)         | 1.032(0.907-1.174)         |
| ≥65 years old            | <b>1.022(1.000-1.045)</b>  | 1.013(0.997-1.030)         | 1.091(0.984-1.211)         | 1.098(0.968-1.246)         |
| <65 years old            | 1.009(0.985-1.032)         | 0.997(0.980-1.015)         | 0.995(0.891-1.111)         | 0.963(0.843-1.101)         |
| Cold season              |                            |                            |                            |                            |
| Non-accidental mortality | <b>1.059(1.034-1.084)</b>  | <b>1.045(1.027-1.062)</b>  | <b>1.317(1.184-1.465)</b>  | <b>1.394(1.230-1.579)</b>  |
| Cardiovascular mortality | <b>1.069(1.034-1.106)</b>  | <b>1.051(1.027-1.076)</b>  | <b>1.371(1.180-1.593)</b>  | <b>1.454(1.219-1.735)</b>  |
| Respiratory mortality    | <b>1.084(1.008-1.166)</b>  | <b>1.072(1.019-1.128)</b>  | <b>1.537(1.111-2.127)</b>  | <b>1.723(1.177-2.521)</b>  |
| Male                     | <b>1.042(1.012-1.072)*</b> | <b>1.033(1.012-1.054)*</b> | <b>1.224(1.078-1.390)*</b> | <b>1.280(1.102-1.486)*</b> |
| Female                   | <b>1.085(1.049-1.122)</b>  | <b>1.063(1.039-1.089)</b>  | <b>1.476(1.269-1.716)</b>  | <b>1.592(1.333-1.901)</b>  |
| ≥65 years old            | <b>1.059(1.028-1.090)</b>  | <b>1.050(1.029-1.072)</b>  | <b>1.351(1.184-1.541)</b>  | <b>1.461(1.252-1.705)</b>  |
| <65 years old            | <b>1.058(1.024-1.093)</b>  | <b>1.038(1.014-1.061)</b>  | <b>1.272(1.100-1.471)</b>  | <b>1.309(1.104-1.553)</b>  |
| Warm season              |                            |                            |                            |                            |
| Non-accidental mortality | 0.987(0.962-1.013)         | 0.993(0.975-1.011)         | 0.953(0.849-1.070)         | 0.952(0.831-1.091)         |
| Cardiovascular mortality | 0.975(0.935-1.016)         | 0.989(0.961-1.018)         | 0.924(0.767-1.112)         | 0.936(0.753-1.163)         |
| Respiratory mortality    | 1.012(0.940-1.089)         | 1.015(0.965-1.068)         | 1.092(0.789-1.513)         | 1.135(0.776-1.661)         |
| Male                     | 1.009(0.987-1.031)         | 1.006(0.991-1.022)         | 1.040(0.943-1.147)         | 1.045(0.932-1.172)         |
| Female                   | 1.008(0.977-1.040)         | 0.999(0.977-1.022)         | 1.004(0.869-1.160)         | 0.983(0.826-1.169)         |
| ≥65 years old            | <b>1.021(1.002-1.040)</b>  | 1.012(0.999-1.026)         | 1.085(0.997-1.180)         | 1.091(0.988-1.204)         |
| <65 years old            | 0.987(0.958-1.017)         | 0.990(0.970-1.011)         | 0.94(0.824-1.073)          | 0.93(0.796-1.086)          |

Bold values represent statistically significant results ( $p < 0.05$ ).

\* Significant results of Z tests for the difference between the two relative risks of subgroup analysis ( $p < 0.05$ ).

The 99th percentile of DTR distribution (10.8 °C for the full year, 11.5 °C for the cold season and 8.8 °C for the warm season) with reference to the minimum relative risk in each subgroup.

**Table S9.** Relative risk (95% *CI*) of non-accidental mortality for extreme high TCN at single-day and cumulative lag periods by varying modeling choices.

| Modeling choices         |                           | Lag 0              | Lag 3              | Lag 0-5            | Lag 0-7            |
|--------------------------|---------------------------|--------------------|--------------------|--------------------|--------------------|
| Non-accidental mortality |                           |                    |                    |                    |                    |
| Full year                | Main model                | 1.086(1.058-1.115) | 1.043(1.027-1.060) | 1.342(1.213-1.486) | 1.331(1.180-1.500) |
| Cold season              |                           | 1.132(1.091-1.175) | 1.071(1.050-1.093) | 1.258(1.177-1.345) | 1.611(1.384-1.876) |
| Warm season              |                           | 1.063(1.023-1.106) | 1.033(1.009-1.056) | 1.248(1.077-1.445) | 1.242(1.043-1.480) |
| Full year                | Df/year for time trend: 6 | 1.091(1.063-1.121) | 1.047(1.031-1.064) | 1.375(1.243-1.522) | 1.371(1.216-1.545) |
| Cold season              | Df for time trend: 2      | 1.136(1.094-1.179) | 1.077(1.055-1.098) | 1.267(1.184-1.355) | 1.682(1.444-1.961) |
| Warm season              |                           | 1.064(1.024-1.106) | 1.033(1.010-1.057) | 1.254(1.083-1.451) | 1.250(1.050-1.488) |
| Full year                | Df/year for time trend: 8 | 1.086(1.057-1.115) | 1.043(1.026-1.059) | 1.337(1.209-1.480) | 1.323(1.174-1.491) |
| Cold season              | Df for time trend: 4      | 1.128(1.088-1.170) | 1.067(1.047-1.089) | 1.250(1.170-1.334) | 1.566(1.348-1.820) |
| Warm season              |                           | 1.064(1.023-1.106) | 1.033(1.010-1.057) | 1.252(1.081-1.450) | 1.248(1.047-1.487) |
| Full year                | Lag period: 5 days        | 1.069(1.040-1.098) | 1.042(1.025-1.058) | 1.311(1.193-1.440) |                    |
| Cold season              |                           | 1.110(1.067-1.156) | 1.062(1.039-1.086) | 1.215(1.133-1.303) |                    |
| Warm season              |                           | 1.059(1.015-1.105) | 1.039(1.014-1.064) | 1.281(1.111-1.478) |                    |
| Full year                | Lag period: 14 days       | 1.080(1.050-1.111) | 1.056(1.033-1.080) | 1.418(1.235-1.629) | 1.501(1.267-1.779) |
| Cold season              |                           | 1.119(1.084-1.155) | 1.090(1.065-1.116) | 1.241(1.169-1.318) | 1.923(1.610-2.298) |
| Warm season              |                           | 1.073(1.038-1.109) | 1.054(1.028-1.080) | 1.393(1.191-1.630) | 1.483(1.225-1.795) |
| Cardiovascular mortality |                           |                    |                    |                    |                    |
| Full year                | Main model                | 1.117(1.073-1.163) | 1.066(1.041-1.092) | 1.538(1.317-1.795) | 1.567(1.304-1.881) |
| Cold season              |                           | 1.145(1.087-1.207) | 1.087(1.056-1.118) | 1.289(1.172-1.417) | 1.814(1.462-2.250) |
| Warm season              |                           | 1.112(1.045-1.183) | 1.052(1.015-1.091) | 1.434(1.136-1.811) | 1.398(1.058-1.847) |
| Full year                | Df/year for time trend: 6 | 1.123(1.079-1.169) | 1.071(1.046-1.097) | 1.586(1.359-1.850) | 1.630(1.359-1.955) |
| Cold season              | Df for time trend: 2      | 1.147(1.089-1.209) | 1.090(1.060-1.121) | 1.294(1.177-1.423) | 1.865(1.504-2.311) |
| Warm season              |                           | 1.112(1.045-1.183) | 1.053(1.015-1.091) | 1.438(1.140-1.814) | 1.402(1.063-1.850) |
| Full year                | Df/year for time trend: 8 | 1.116(1.072-1.162) | 1.064(1.039-1.090) | 1.525(1.306-1.781) | 1.548(1.289-1.859) |
| Cold season              | Df for time trend: 4      | 1.141(1.084-1.203) | 1.083(1.053-1.114) | 1.280(1.166-1.407) | 1.767(1.426-2.190) |
| Warm season              |                           | 1.114(1.047-1.185) | 1.055(1.017-1.093) | 1.452(1.151-1.833) | 1.421(1.077-1.877) |
| Full year                | Lag period: 5 days        | 1.118(1.073-1.165) | 1.064(1.039-1.090) | 1.523(-1.32-1.757) |                    |
| Cold season              |                           | 1.146(1.083-1.213) | 1.085(1.052-1.119) | 1.289(1.169-1.422) |                    |

|                       |                           |                           |                           |                           |                           |
|-----------------------|---------------------------|---------------------------|---------------------------|---------------------------|---------------------------|
| Warm season           |                           | <b>1.129(1.055-1.207)</b> | <b>1.042(1.003-1.082)</b> | <b>1.385(1.103-1.738)</b> |                           |
| Full year             |                           | <b>1.120(1.073-1.170)</b> | <b>1.086(1.050-1.123)</b> | <b>1.691(1.368-2.090)</b> | <b>1.853(1.430-2.402)</b> |
| Cold season           | Lag period: 14 days       | <b>1.152(1.101-1.205)</b> | <b>1.114(1.077-1.152)</b> | <b>1.312(1.204-1.430)</b> | <b>2.265(1.756-2.923)</b> |
| Warm season           |                           | <b>1.098(1.043-1.157)</b> | <b>1.069(1.027-1.112)</b> | <b>1.530(1.193-1.962)</b> | <b>1.638(1.210-2.216)</b> |
| Respiratory mortality |                           |                           |                           |                           |                           |
| Full year             |                           | 1.071(0.976-1.175)        | 1.034(0.978-1.093)        | 1.265(0.885-1.809)        | 1.246(0.817-1.899)        |
| Cold season           | Main model                | <b>1.178(1.048-1.324)</b> | <b>1.089(1.022-1.160)</b> | <b>1.352(1.095-1.669)</b> | <b>1.779(1.096-2.887)</b> |
| Warm season           |                           | 1.081(0.933-1.253)        | 1.085(0.996-1.183)        | 1.627(0.933-2.838)        | 1.935(0.999-3.746)        |
| Full year             | Df/year for time trend: 6 | 1.072(0.977-1.176)        | 1.033(0.978-1.092)        | 1.263(0.886-1.800)        | 1.237(0.814-1.879)        |
| Cold season           | Df for time trend: 2      | <b>1.191(1.057-1.342)</b> | <b>1.110(1.041-1.183)</b> | <b>1.386(1.118-1.718)</b> | <b>2.097(1.285-3.420)</b> |
| Warm season           |                           | 1.088(0.940-1.261)        | <b>1.092(1.002-1.190)</b> | 1.692(0.973-2.941)        | <b>2.034(1.055-3.921)</b> |
| Full year             | Df/year for time trend: 8 | 1.070(0.975-1.174)        | 1.033(0.978-1.092)        | 1.261(0.882-1.804)        | 1.242(0.814-1.895)        |
| Cold season           | Df for time trend: 4      | <b>1.179(1.049-1.326)</b> | <b>1.089(1.022-1.160)</b> | <b>1.354(1.096-1.673)</b> | <b>1.774(1.092-2.884)</b> |
| Warm season           |                           | 1.080(0.932-1.252)        | 1.084(0.994-1.182)        | 1.617(0.927-2.821)        | 1.917(0.990-3.714)        |
| Full year             |                           | 1.052(0.958-1.156)        | 1.029(0.975-1.087)        | 1.216(0.876-1.688)        |                           |
| Cold season           | Lag period: 5 days        | <b>1.179(1.041-1.336)</b> | 1.027(0.958-1.101)        | <b>1.328(1.069-1.649)</b> |                           |
| Warm season           |                           | 1.031(0.879-1.209)        | <b>1.162(1.064-1.269)</b> | <b>2.182(1.281-3.715)</b> |                           |
| Full year             |                           | 1.001(0.907-1.106)        | 0.987(0.913-1.067)        | 0.936(0.575-1.524)        | 0.881(0.485-1.600)        |
| Cold season           | Lag period: 14 days       | <b>1.168(1.058-1.289)</b> | <b>1.123(1.043-1.209)</b> | <b>1.347(1.115-1.626)</b> | <b>2.405(1.370-4.223)</b> |
| Warm season           |                           | 1.107(0.978-1.253)        | 1.096(0.996-1.205)        | 1.749(0.963-3.177)        | 2.051(0.990-4.246)        |

Bold values represent statistically significant results ( $p < 0.05$ ).

The 99th percentile of TCN distribution (3.3 °C for the full year, 3.9 °C for the cold season and 2.7 °C for the warm season) with a reference of 0 °C.

**Table S10.** Relative risk (95% *CI*) of non-accidental mortality for extreme high TCN at single-day and cumulative lag periods with adjustment for the DTR variable.

|                          | Lag 0                     | Lag 3                     | Lag 0–5                   | Lag 0–7                   |
|--------------------------|---------------------------|---------------------------|---------------------------|---------------------------|
| Non-accidental mortality |                           |                           |                           |                           |
| Full year                | <b>1.085(1.055-1.115)</b> | <b>1.043(1.026-1.060)</b> | <b>1.336(1.202-1.486)</b> | <b>1.324(1.170-1.499)</b> |
| Cold season              | <b>1.125(1.082-1.170)</b> | <b>1.068(1.046-1.090)</b> | <b>1.244(1.160-1.335)</b> | <b>1.575(1.344-1.845)</b> |
| Warm season              | <b>1.069(1.027-1.112)</b> | <b>1.034(1.011-1.059)</b> | <b>1.266(1.091-1.470)</b> | <b>1.255(1.053-1.497)</b> |
| Cardiovascular mortality |                           |                           |                           |                           |
| Full year                | <b>1.113(1.067-1.161)</b> | <b>1.063(1.037-1.090)</b> | <b>1.513(1.287-1.778)</b> | <b>1.539(1.275-1.859)</b> |
| Cold season              | <b>1.135(1.074-1.199)</b> | <b>1.081(1.049-1.113)</b> | <b>1.267(1.147-1.400)</b> | <b>1.746(1.395-2.186)</b> |
| Warm season              | <b>1.114(1.046-1.187)</b> | <b>1.053(1.015-1.092)</b> | <b>1.442(1.139-1.826)</b> | <b>1.402(1.060-1.853)</b> |
| Respiratory mortality    |                           |                           |                           |                           |
| Full year                | 1.094(0.993-1.206)        | 1.045(0.987-1.107)        | 1.365(0.942-1.978)        | 1.341(0.871-2.067)        |
| Cold season              | <b>1.197(1.059-1.352)</b> | <b>1.096(1.026-1.171)</b> | <b>1.391(1.116-1.734)</b> | <b>1.855(1.125-3.059)</b> |
| Warm season              | 1.127(0.969-1.311)        | <b>1.102(1.011-1.203)</b> | <b>1.835(1.045-3.222)</b> | <b>2.119(1.093-4.108)</b> |

Bold values represent statistically significant results ( $p < 0.05$ ).

The 99th percentile of TCN distribution (3.3 °C for the full year, 3.9 °C for the cold season and 2.7 °C for the warm season) with a reference of 0 °C.

**Table S11.** Relative risk (95% *CI*) of non-accidental mortality for extreme high TCN at single-day and cumulative lag periods with adjustment for co-pollutants.

| Pollutants                                                                 |                          | Lag 0                     | Lag 3                     | Lag 0–5                   | Lag 0–7                   |
|----------------------------------------------------------------------------|--------------------------|---------------------------|---------------------------|---------------------------|---------------------------|
| NO <sub>2</sub> +PM <sub>10</sub> +CO<br>+SO <sub>2</sub> +O <sub>3</sub>  | Non-accidental mortality |                           |                           |                           |                           |
|                                                                            | Full year                | <b>1.080(1.050-1.111)</b> | <b>1.041(1.024-1.059)</b> | <b>1.321(1.185-1.472)</b> | <b>1.314(1.158-1.492)</b> |
|                                                                            | Cold season              | <b>1.115(1.073-1.159)</b> | <b>1.064(1.042-1.086)</b> | <b>1.225(1.142-1.313)</b> | <b>1.537(1.314-1.796)</b> |
|                                                                            | Warm season              | <b>1.059(1.017-1.103)</b> | <b>1.031(1.007-1.056)</b> | <b>1.234(1.059-1.438)</b> | <b>1.231(1.026-1.475)</b> |
|                                                                            | Cardiovascular mortality |                           |                           |                           |                           |
|                                                                            | Full year                | <b>1.111(1.065-1.160)</b> | <b>1.064(1.037-1.091)</b> | <b>1.515(1.284-1.787)</b> | <b>1.548(1.276-1.879)</b> |
|                                                                            | Cold season              | <b>1.126(1.066-1.190)</b> | <b>1.077(1.046-1.109)</b> | <b>1.250(1.132-1.380)</b> | <b>1.712(1.371-2.136)</b> |
|                                                                            | Warm season              | <b>1.105(1.036-1.179)</b> | <b>1.050(1.011-1.091)</b> | <b>1.412(1.107-1.802)</b> | <b>1.384(1.037-1.848)</b> |
|                                                                            | Respiratory mortality    |                           |                           |                           |                           |
|                                                                            | Full year                | 1.081(0.980-1.193)        | 1.043(0.983-1.106)        | 1.332(0.911-1.947)        | 1.329(0.852-2.072)        |
|                                                                            | Cold season              | <b>1.171(1.035-1.324)</b> | <b>1.089(1.020-1.163)</b> | <b>1.338(1.071-1.671)</b> | <b>1.797(1.092-2.957)</b> |
|                                                                            | Warm season              | 1.121(0.962-1.306)        | <b>1.104(1.009-1.208)</b> | <b>1.840(1.030-3.287)</b> | <b>2.166(1.092-4.297)</b> |
| NO <sub>2</sub> +PM <sub>2.5</sub> +CO<br>+SO <sub>2</sub> +O <sub>3</sub> | Non-accidental mortality |                           |                           |                           |                           |
|                                                                            | Full year                | <b>1.081(1.051-1.112)</b> | <b>1.042(1.024-1.059)</b> | <b>1.327(1.191-1.478)</b> | <b>1.320(1.163-1.498)</b> |
|                                                                            | Cold season              | <b>1.116(1.073-1.160)</b> | <b>1.063(1.042-1.086)</b> | <b>1.225(1.142-1.314)</b> | <b>1.534(1.312-1.793)</b> |
|                                                                            | Warm season              | <b>1.060(1.018-1.103)</b> | <b>1.031(1.007-1.056)</b> | <b>1.235(1.060-1.440)</b> | <b>1.233(1.028-1.478)</b> |
|                                                                            | Cardiovascular mortality |                           |                           |                           |                           |
|                                                                            | Full year                | <b>1.114(1.067-1.163)</b> | <b>1.066(1.039-1.093)</b> | <b>1.531(1.298-1.805)</b> | <b>1.568(1.293-1.902)</b> |
|                                                                            | Cold season              | <b>1.125(1.065-1.189)</b> | <b>1.077(1.046-1.109)</b> | <b>1.248(1.130-1.378)</b> | <b>1.706(1.367-2.130)</b> |
|                                                                            | Warm season              | <b>1.108(1.039-1.182)</b> | <b>1.052(1.013-1.093)</b> | <b>1.429(1.120-1.823)</b> | <b>1.401(1.048-1.871)</b> |
|                                                                            | Respiratory mortality    |                           |                           |                           |                           |
|                                                                            | Full year                | 1.085(0.984-1.198)        | 1.046(0.987-1.109)        | 1.360(0.931-1.986)        | 1.365(0.877-2.127)        |
|                                                                            | Cold season              | <b>1.170(1.034-1.323)</b> | <b>1.090(1.021-1.164)</b> | <b>1.336(1.070-1.669)</b> | <b>1.812(1.101-2.983)</b> |
|                                                                            | Warm season              | 1.112(0.955-1.296)        | <b>1.102(1.007-1.206)</b> | <b>1.811(1.014-3.237)</b> | <b>2.156(1.085-4.284)</b> |

Bold values represent statistically significant results ( $p < 0.05$ ).

The 99th percentile of TCN distribution (3.3 °C for the full year, 3.9 °C for the cold season and 2.7 °C for the warm season) with a reference of 0 °C.

**Table S12.** Relative risk (95% *CI*) of non-accidental mortality for extreme high TCN at single-day and cumulative lag periods with adjustment for apparent temperature.

| <b>Apparent Temperature</b> |                          | <b>Lag 0</b>              | <b>Lag 3</b>              | <b>Lag 0–5</b>             | <b>Lag 0–7</b>            |
|-----------------------------|--------------------------|---------------------------|---------------------------|----------------------------|---------------------------|
| Df = 2                      | Non-accidental mortality |                           |                           |                            |                           |
|                             | Full year                | <b>1.087(1.058-1.116)</b> | <b>1.044(1.027-1.060)</b> | <b>1.345(1.215-1.488)</b>  | <b>1.332(1.182-1.502)</b> |
|                             | Cold season              | <b>1.132(1.091-1.174)</b> | <b>1.071(1.050-1.093)</b> | <b>1.257(1.176-1.344)</b>  | <b>1.611(1.383-1.875)</b> |
|                             | Warm season              | <b>1.064(1.024-1.106)</b> | <b>1.033(1.010-1.057)</b> | <b>1.250(1.080-1.4470)</b> | <b>1.244(1.044-1.482)</b> |
|                             | Cardiovascular mortality |                           |                           |                            |                           |
|                             | Full year                | <b>1.120(1.076-1.166)</b> | <b>1.067(1.042-1.093)</b> | <b>1.551(1.329-1.811)</b>  | <b>1.579(1.315-1.896)</b> |
|                             | Cold season              | <b>1.147(1.088-1.209)</b> | <b>1.087(1.057-1.118)</b> | <b>1.292(1.176-1.421)</b>  | <b>1.817(1.464-2.255)</b> |
|                             | Warm season              | <b>1.115(1.049-1.187)</b> | <b>1.054(1.016-1.093)</b> | <b>1.449(1.148-1.829)</b>  | <b>1.409(1.067-1.861)</b> |
|                             | Respiratory mortality    |                           |                           |                            |                           |
|                             | Full year                | 1.067(0.973-1.171)        | 1.032(0.977-1.091)        | 1.251(0.876-1.788)         | 1.234(0.810-1.881)        |
|                             | Cold season              | <b>1.178(1.049-1.324)</b> | <b>1.089(1.022-1.160)</b> | <b>1.352(1.096-1.669)</b>  | <b>1.779(1.097-2.886)</b> |
|                             | Warm season              | 1.075(0.928-1.244)        | 1.083(0.994-1.181)        | 1.602(0.921-2.789)         | 1.914(0.989-3.702)        |
| Df = 4                      | Non-accidental mortality |                           |                           |                            |                           |
|                             | Full year                | <b>1.086(1.058-1.115)</b> | <b>1.043(1.027-1.060)</b> | <b>1.343(1.213-1.487)</b>  | <b>1.331(1.180-1.501)</b> |
|                             | Cold season              | <b>1.132(1.091-1.174)</b> | <b>1.071(1.050-1.093)</b> | <b>1.258(1.177-1.345)</b>  | <b>1.615(1.387-1.880)</b> |
|                             | Warm season              | <b>1.063(1.023-1.106)</b> | <b>1.032(1.009-1.056)</b> | <b>1.248(1.077-1.445)</b>  | <b>1.241(1.041-1.479)</b> |
|                             | Cardiovascular mortality |                           |                           |                            |                           |
|                             | Full year                | <b>1.115(1.071-1.161)</b> | <b>1.065(1.040-1.091)</b> | <b>1.530(1.310-1.786)</b>  | <b>1.562(-1.30-1.876)</b> |
|                             | Cold season              | <b>1.145(1.087-1.207)</b> | <b>1.087(1.057-1.118)</b> | <b>1.289(1.172-1.417)</b>  | <b>1.816(1.463-2.253)</b> |
|                             | Warm season              | <b>1.111(1.044-1.183)</b> | <b>1.052(1.015-1.091)</b> | <b>1.433(1.135-1.810)</b>  | <b>1.396(1.057-1.845)</b> |
|                             | Respiratory mortality    |                           |                           |                            |                           |
|                             | Full year                | 1.072(0.976-1.176)        | 1.034(0.978-1.093)        | 1.267(0.886-1.811)         | 1.246(0.817-1.900)        |
|                             | Cold season              | <b>1.176(1.047-1.322)</b> | <b>1.089(1.023-1.160)</b> | <b>1.349(1.092-1.665)</b>  | <b>1.791(1.104-2.904)</b> |
|                             | Warm season              | 1.081(0.933-1.253)        | 1.085(0.995-1.183)        | 1.628(0.933-2.839)         | 1.936(0.999-3.749)        |

Bold values represent statistically significant results ( $p < 0.05$ ).

The 99th percentile of TCN distribution (3.3 °C for the full year, 3.9 °C for the cold season and 2.7 °C for the warm season) with a reference of 0 °C.

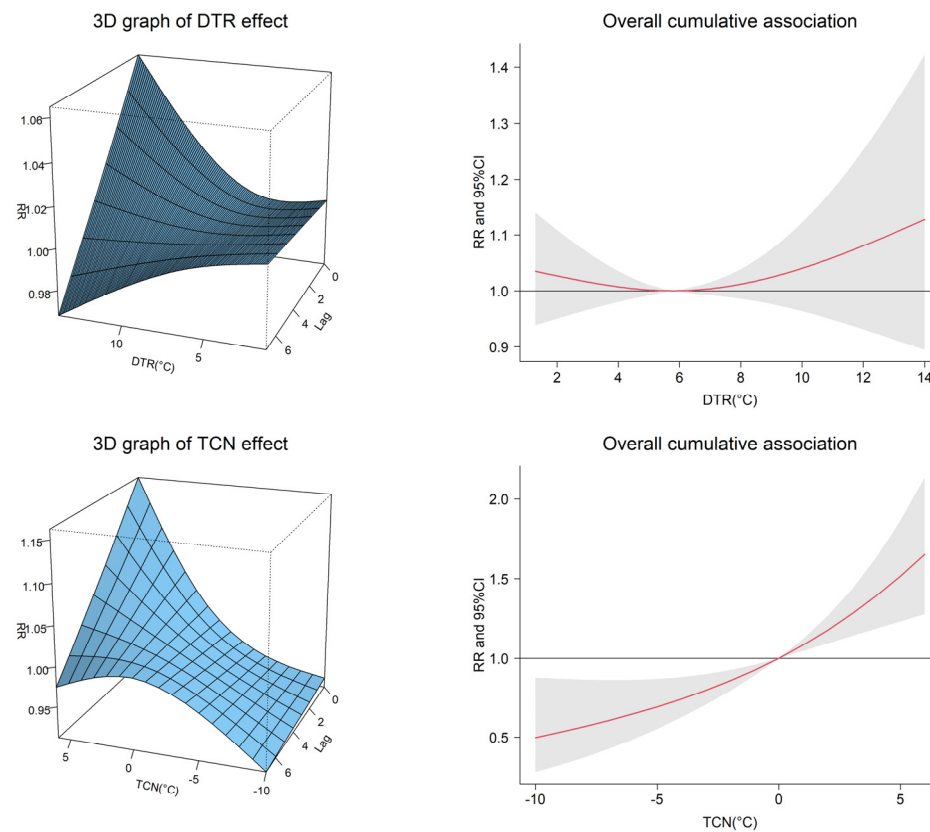

**Figure S1.** Exposure–response relationship between temperature change and risk of non-accidental mortality. Left panels: 3D plots of the exposure–lag–response risks. Right panels: overall exposure–response associations with diurnal temperature change (DTR) and temperature change between neighboring days (TCN).

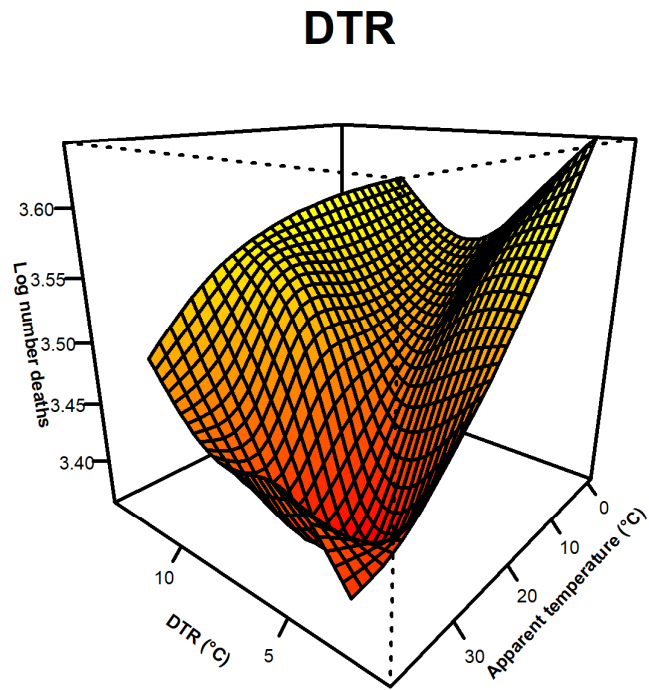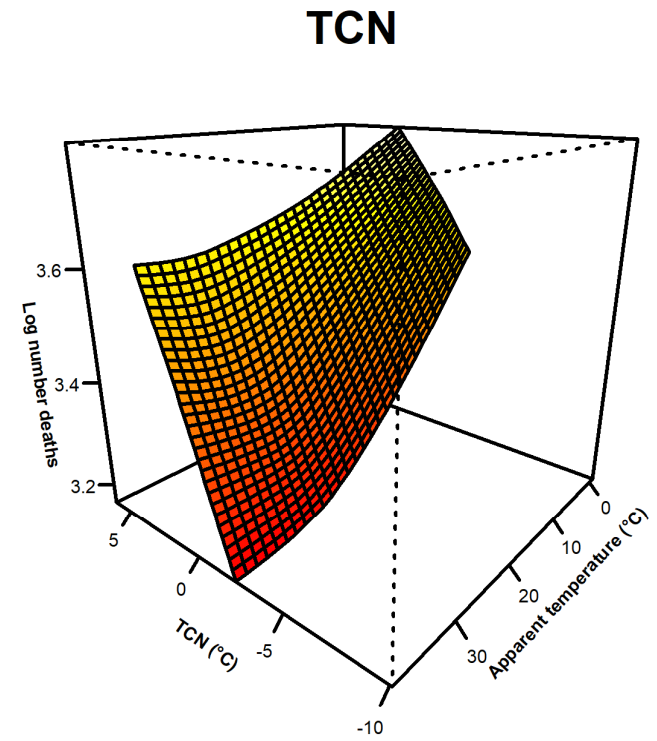

**Figure S2.** Bivariate response surface of apparent temperature and temperature change on non-accidental mortality (Left: lag 0–5 for DTR and lag 0 for AT; right: lag 0–5 for TCN and lag 0 for AT).
